# Supplementary material for: Synthesis of novel TEMPO stable free (poly)radical derivatives and their host–guest interaction with cucurbit[6]uril
Source: Royal Society of Chemistry journal article supplement (doi:10.1039/c5nj01518a), 2015-11-10
Supplement: c5nj01518a1.pdf [file c5nj01518a1.pdf]

## Synthesis of novel TEMPO stable free (poly)radical derivatives and their host-guest interaction with cucurbit[6]uril

Gabriela Ionita, Augustin M. Madalan, Ana Maria Ariciu, Andrei Medvedovici and Petre Ionita

*Electronic Supplementary Information (ESI)*

*New Journal of Chemistry*

*Date: 24 September 2015*

### Content:

|                                                                                                                                                                                                                                     |    |
|-------------------------------------------------------------------------------------------------------------------------------------------------------------------------------------------------------------------------------------|----|
| <b>Table S1.</b> ESR spectra in dichloromethane of the nitroxides presented in this study                                                                                                                                           | 2  |
| <b>Figure S1.</b> Views of supramolecular column generated by $\pi$ - $\pi$ stacking interactions (a) and of the packing diagram along the crystallographic $a$ axis (b) in crystal <b>1a</b>                                       | 5  |
| <b>Figure S2.</b> Views of the supramolecular architecture generated by hydrogen bonding and $\pi$ - $\pi$ stacking interactions along the crystallographic $c$ axis (a) and $a$ axis (b) in crystal <b>1c</b>                      | 5  |
| <b>Figure S3.</b> The ESR spectra of the radicals <b>2a-3a</b> in the absence and in the presence of Q[6]                                                                                                                           | 6  |
| <b>Evaluation of the binding constants assuming 1:1 complexation ratio</b>                                                                                                                                                          | 7  |
| <b>Table S1:</b> The ratio of $\tau_c$ values obtained for each radical in the presence of Q[6] ( $10^{-2}$ M) and in the absence of Q[6] and the ratio between molecular weight of the complex and molecular weight of the radical | 7  |
| <b>Determination of activation energy for the rotation motion in the complex</b>                                                                                                                                                    | 9  |
| <b>Figure S4.</b> Variation of logarithmic binding constants with reciprocal temperature corresponding to Q[6]/ <b>1b</b> (black) and Q[6]/ <b>2c</b> complexes (red)                                                               | 10 |

Table S1. ESR spectra in dichloromethane of the nitroxides presented in this study

|                                                                                                      |                                                                                      |
|------------------------------------------------------------------------------------------------------|--------------------------------------------------------------------------------------|
| <p><b>1a</b></p> 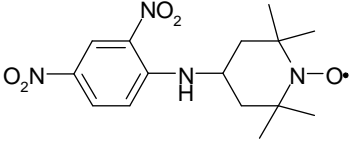   |    |
| <p><b>1b</b></p>    |    |
| <p><b>1c</b></p>   |   |
| <p><b>1d</b></p>  |  |
| <p><b>1e</b></p>  |  |

|                                                                                                                                  |                                                                                      |
|----------------------------------------------------------------------------------------------------------------------------------|--------------------------------------------------------------------------------------|
| <p style="text-align: center;"><b>2a</b></p> 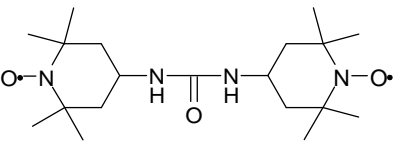   |    |
| <p style="text-align: center;"><b>2b</b></p>    |    |
| <p style="text-align: center;"><b>2c</b></p>  |  |
| <p style="text-align: center;"><b>2d</b></p>  |  |

**3a**

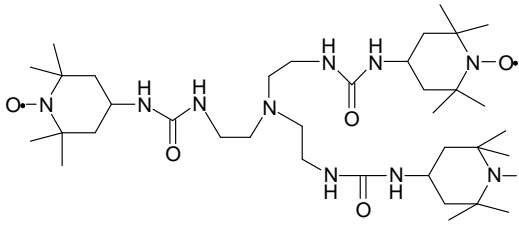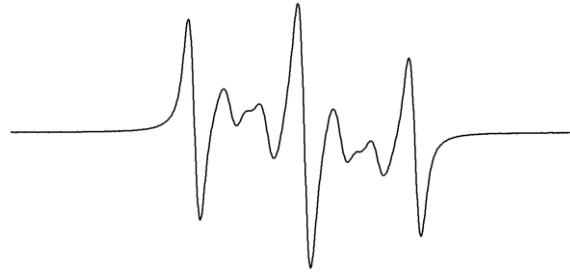

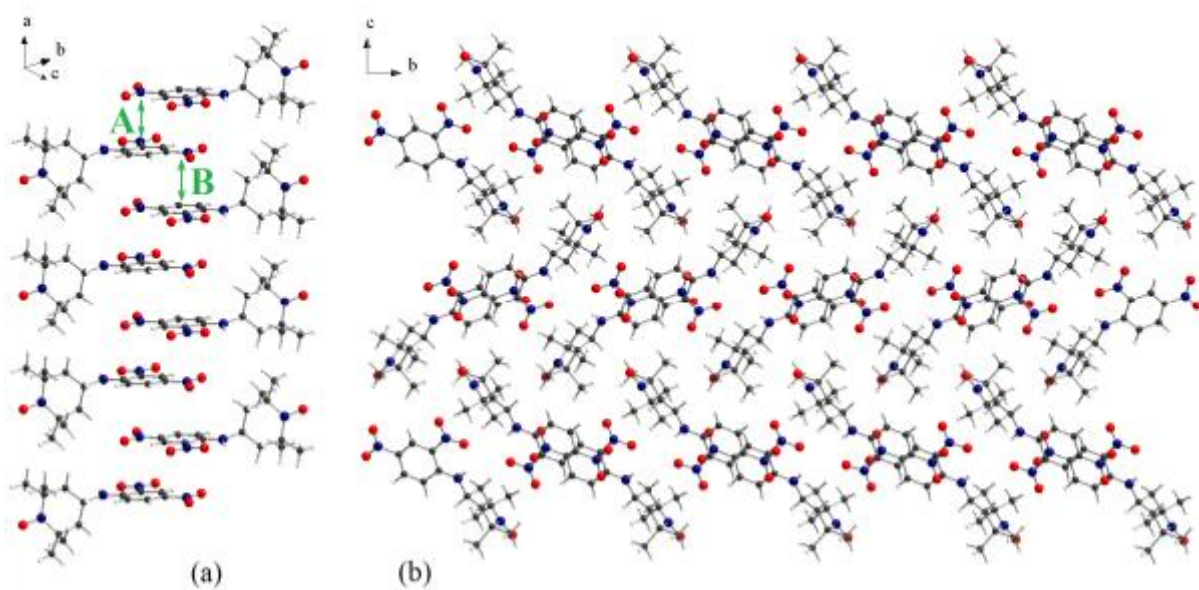

**Figure S1.** Views of supramolecular column generated by  $\pi$ - $\pi$  stacking interactions (a) and of the packing diagram along the crystallographic  $a$  axis (b) in crystal **1a**

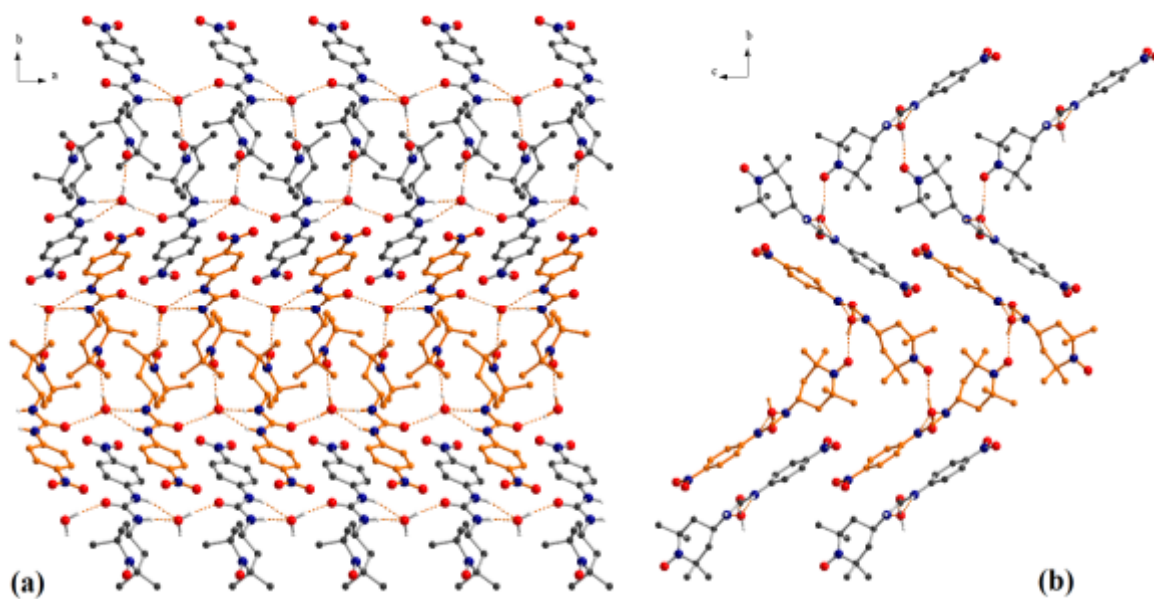

**Figure S2.** Views of the supramolecular architecture generated by hydrogen bonding and  $\pi$ - $\pi$  stacking interactions along the crystallographic  $c$  axis (a) and  $a$  axis (b) in crystal **1c**

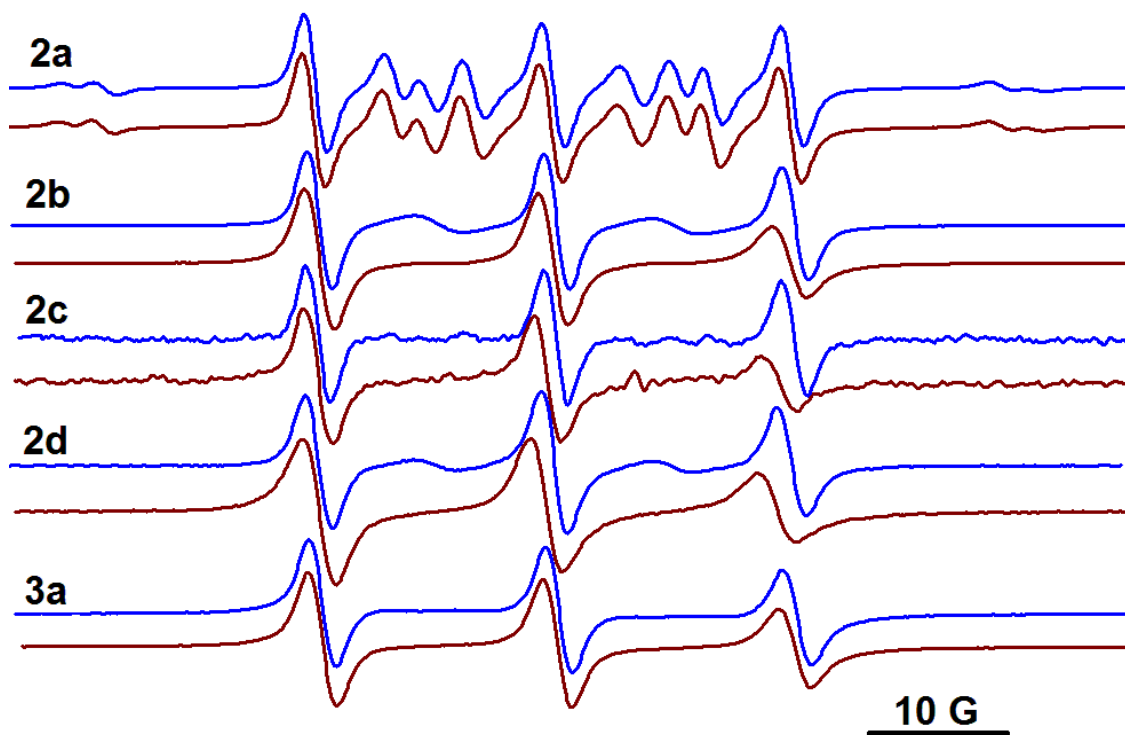

**Figure S3.** The ESR spectra of the radicals **2a-3a** in the absence of Q[6] - (blue spectra) and in the presence of Q[6] at highest concentration (red spectra)

### Evaluation of the binding constants assuming 1:1 complexation ratio

We consider that 1:1 complexation ratio between radical and Q[6] represents the major complex component in solution, although we don't exclude the presence of complexes with higher stoichiometry (1:2 radical/Q[6]), especially at higher concentration of Q[6]. As it was mentioned in the manuscript,  $a_N$  values corresponding to radicals in aqueous solutions decrease by increasing the concentration of host concentration in most of the cases. There are two compounds, a diradical (**2a**) and the triradical which are not sensitive to the presence of Q[6]. This might be an indication that formation of complexes with higher stoichiometry is not favored.

The rotational correlation time is a parameter proportional with the molecular radius of paramagnetic entity (in our case the complex). In table S1 are presented the ratio between the values of  $\tau_c$  corresponding to solution in the presence and in the absence of Q[6] (at concentration  $10^{-2}$  M) and the ratio between the molecular weight of the complex (as sum of radical and Q[6] molecular weights). Although we are aware that might be differences between the radius ratio and molecular weight ratio we consider that this approach is still valid. It can be observed that the values of  $\tau$  ratio and molecular weight ratio for a 1:1 complexation are similar. At  $10^{-2}$  M concentration of the Q[6], the complex represents the main species, even the binding constants are relatively small.

**Table S1:** The ratio of  $\tau_c$  values obtained for each radical in the presence of Q[6] ( $10^{-2}$  M) and in the absence of Q[6] and the ratio between molecular weight of the complex and molecular weight of the radical

| Radical                                | <b>1a</b> | <b>1b</b> | <b>1c</b> | <b>1d</b> | <b>1e</b> | <b>2b</b> | <b>2c</b> | <b>2d</b> |
|----------------------------------------|-----------|-----------|-----------|-----------|-----------|-----------|-----------|-----------|
| $\tau(Q[6])/\tau_c(0)$                 | 3.7       | 4.2       | 2.7       | 3.3       | 2.6       | 4.3       | 3.5       | 2.4       |
| MW(complex)/MW(radical)<br>(1:1 ratio) | 3.9       | 3.9       | 3.9       | 3.1       | 3.5       | 3.2       | 2.7       | 3.0       |
| MW(complex)/MW(radical)<br>(1:2 ratio) | 6.9       | 6.8       | 6.9       | 5.1       | 6.0       | 5.4       | 4.4       | 5.1       |

A linear relationship between  $\tau_c$  and the concentration of the complex in solution was assumed (eq. 1).

$$\tau_c = a[R] + b[RQ] \quad (1)$$

in which [R] is concentration of the free radical, [RQ] concentration of radical/cucurbituril complex, a and b constants.

The equilibrium constant for complexation is described by the relation (2):

$$K = \frac{[RQ]}{([R_0] - [RQ])([Q_0] - [RQ])} \quad (2)$$

$[R_0]$  represents the initial concentration of the radical and  $[Q_0]$  is the initial concentration of the cucurbit[6]uril.

Concentration of the free radical in solution is described by equation 3:

$$[R] = \frac{(K[R_0] - K[b - Q_0] - 1) + \sqrt{(K[R_0] - K[b - Q_0] - 1)^2 + 4K[R_0]}}{2K} \quad (3)$$

$$[RQ] = [R_0] - [R] \quad (4)$$

Considering equations (3) and (4), the variation of  $\tau_c$  as a function of  $K$  is:

$$\tau_c = a \times \frac{(K[R_0] - K[b - Q_0] - 1) + \sqrt{(K[R_0] - K[b - Q_0] - 1)^2 + 4K[R_0]}}{2K} + b \times \left( [R_0] - \frac{(K[R_0] - K[b - Q_0] - 1) + \sqrt{(K[R_0] - K[b - Q_0] - 1)^2 + 4K[R_0]}}{2K} \right) \quad (5)$$



### Determination of activation energy for the rotation motion in the complex

The complexation process schematically described here is described by variation of the enthalpy and variation of the entropy.

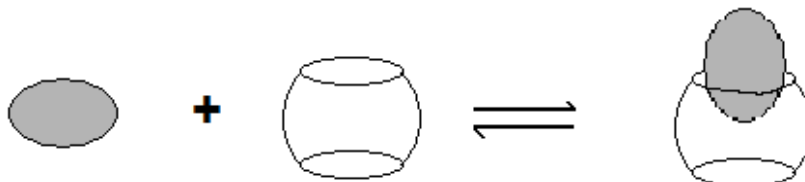

These parameters can be obtained from:

a) Gibbs free energy ( $\Delta G$ ) equation (6):

$$\Delta G = \Delta H - T\Delta S \quad (6)$$

in which  $\Delta H$  is enthalpy variation and  $\Delta S$  is entropy variation associated in this case with the complexation process.

and

b) the Gibbs free energy isotherm equation (7),

$$\Delta G = -RT \ln K \quad (7)$$

in which  $K$  represents the equilibrium constant (or binding constant).

The equations 6 and 7 are combined to obtain the van't Hoff equation:

$$\ln K = -\frac{\Delta H}{RT} + \frac{\Delta S}{R} \quad (8)$$

$\Delta H$  and  $\Delta S$  values for radicals **1b** and **2c** can be thus obtained from the slope ( $\Delta H = -\text{slope} \times R$ ) and from the interception ( $\Delta S = \text{slope} \times R$ ), respectively of the van't Hoff plot (Figure S4).

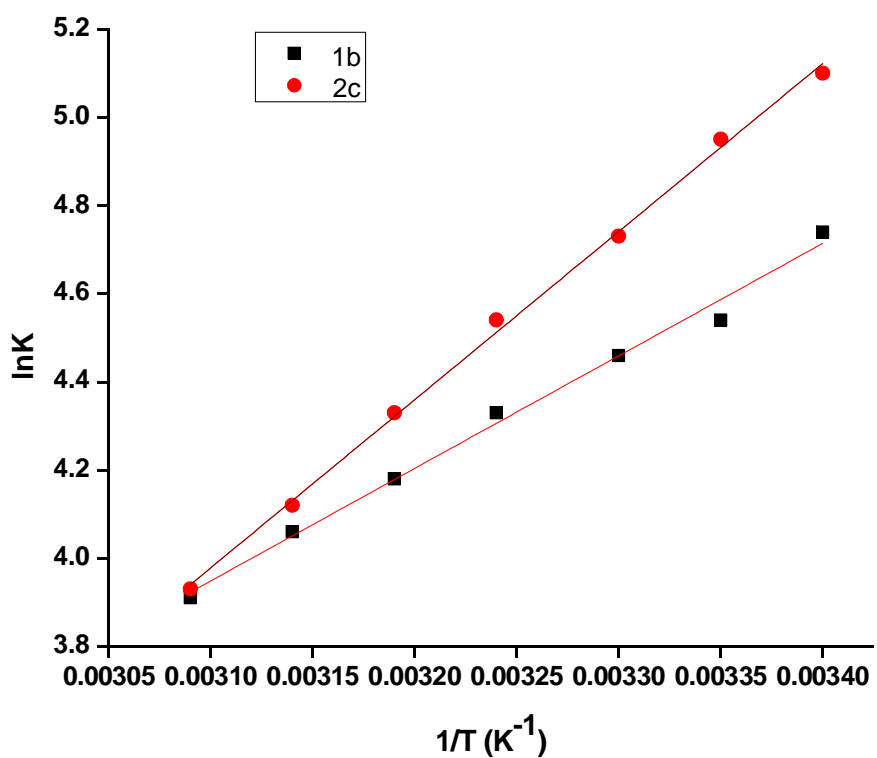

**Figure S4.** Variation of logarithmic binding constants with reciprocal temperature corresponding to Q[6]/**1b** (black) and Q[6]/**2c** complexes (red)

| Radical   | Slope   | Interception |
|-----------|---------|--------------|
| <b>1b</b> | 2551.95 | -3.962       |
| <b>2c</b> | 3813.01 | -7.842       |
